# Supplementary material
Source: PubMed Central journal article supplement (PMC6219383)
Supplement: NIHMS991148-supplement-Scoring_sheet.pdf [file NIHMS991148-supplement-Scoring_sheet.pdf]

Washington University Neonatal Neurology & Physiology Research Laboratory MRI Scoring Sheet

MRI scoring reader: \_\_\_\_\_ Date: \_\_\_\_\_ MRN: \_\_\_\_\_ STUDY ID: \_\_\_\_\_ MRI# 1 (DOL= ) MRI#2 (DOL= )

|                     |                            |                            |                            |                            |                     |                            |                            |                            |                            |                      |                            |                            |                            |                            |
|---------------------|----------------------------|----------------------------|----------------------------|----------------------------|---------------------|----------------------------|----------------------------|----------------------------|----------------------------|----------------------|----------------------------|----------------------------|----------------------------|----------------------------|
| Caudate T1 Left     | <input type="checkbox"/> 0 | <input type="checkbox"/> 1 | <input type="checkbox"/> 2 | <input type="checkbox"/> 3 | Caudate T2 Left     | <input type="checkbox"/> 0 | <input type="checkbox"/> 1 | <input type="checkbox"/> 2 | <input type="checkbox"/> 3 | Caudate DWI Left     | <input type="checkbox"/> 0 | <input type="checkbox"/> 1 | <input type="checkbox"/> 2 | <input type="checkbox"/> 3 |
| Caudate T1 Right    | <input type="checkbox"/> 0 | <input type="checkbox"/> 1 | <input type="checkbox"/> 2 | <input type="checkbox"/> 3 | Caudate T2 Right    | <input type="checkbox"/> 0 | <input type="checkbox"/> 1 | <input type="checkbox"/> 2 | <input type="checkbox"/> 3 | Caudate DWI Right    | <input type="checkbox"/> 0 | <input type="checkbox"/> 1 | <input type="checkbox"/> 2 | <input type="checkbox"/> 3 |
| Put/Glob T1 Left    | <input type="checkbox"/> 0 | <input type="checkbox"/> 1 | <input type="checkbox"/> 2 | <input type="checkbox"/> 3 | Put/Glob T2 Left    | <input type="checkbox"/> 0 | <input type="checkbox"/> 1 | <input type="checkbox"/> 2 | <input type="checkbox"/> 3 | Put/Glob DWI Left    | <input type="checkbox"/> 0 | <input type="checkbox"/> 1 | <input type="checkbox"/> 2 | <input type="checkbox"/> 3 |
| Put/Glob T1 Right   | <input type="checkbox"/> 0 | <input type="checkbox"/> 1 | <input type="checkbox"/> 2 | <input type="checkbox"/> 3 | Put/Glob T2 Right   | <input type="checkbox"/> 0 | <input type="checkbox"/> 1 | <input type="checkbox"/> 2 | <input type="checkbox"/> 3 | Put/Glob DWI Right   | <input type="checkbox"/> 0 | <input type="checkbox"/> 1 | <input type="checkbox"/> 2 | <input type="checkbox"/> 3 |
| Thalamus T1 Left    | <input type="checkbox"/> 0 | <input type="checkbox"/> 1 | <input type="checkbox"/> 2 | <input type="checkbox"/> 3 | Thalamus T2 Left    | <input type="checkbox"/> 0 | <input type="checkbox"/> 1 | <input type="checkbox"/> 2 | <input type="checkbox"/> 3 | Thalamus DWI Left    | <input type="checkbox"/> 0 | <input type="checkbox"/> 1 | <input type="checkbox"/> 2 | <input type="checkbox"/> 3 |
| Thalamus T1 Right   | <input type="checkbox"/> 0 | <input type="checkbox"/> 1 | <input type="checkbox"/> 2 | <input type="checkbox"/> 3 | Thalamus T2 Right   | <input type="checkbox"/> 0 | <input type="checkbox"/> 1 | <input type="checkbox"/> 2 | <input type="checkbox"/> 3 | Thalamus DWI Right   | <input type="checkbox"/> 0 | <input type="checkbox"/> 1 | <input type="checkbox"/> 2 | <input type="checkbox"/> 3 |
| PLIC T1 Left        | <input type="checkbox"/> 0 | <input type="checkbox"/> 1 | <input type="checkbox"/> 2 | <input type="checkbox"/> 3 | PLIC T2 Left        | <input type="checkbox"/> 0 | <input type="checkbox"/> 1 | <input type="checkbox"/> 2 | <input type="checkbox"/> 3 | PLIC DWI Left        | <input type="checkbox"/> 0 | <input type="checkbox"/> 1 | <input type="checkbox"/> 2 | <input type="checkbox"/> 3 |
| PLIC T1 Right       | <input type="checkbox"/> 0 | <input type="checkbox"/> 1 | <input type="checkbox"/> 2 | <input type="checkbox"/> 3 | PLIC T2 Right       | <input type="checkbox"/> 0 | <input type="checkbox"/> 1 | <input type="checkbox"/> 2 | <input type="checkbox"/> 3 | PLIC DWI Right       | <input type="checkbox"/> 0 | <input type="checkbox"/> 1 | <input type="checkbox"/> 2 | <input type="checkbox"/> 3 |
| <hr/>               |                            |                            |                            |                            | <hr/>               |                            |                            |                            |                            | <hr/>                |                            |                            |                            |                            |
| WM T1 Left          | <input type="checkbox"/> 0 | <input type="checkbox"/> 1 | <input type="checkbox"/> 2 | <input type="checkbox"/> 3 | WM T2 Left          | <input type="checkbox"/> 0 | <input type="checkbox"/> 1 | <input type="checkbox"/> 2 | <input type="checkbox"/> 3 | WM DWI Left          | <input type="checkbox"/> 0 | <input type="checkbox"/> 1 | <input type="checkbox"/> 2 | <input type="checkbox"/> 3 |
| WM T1 Right         | <input type="checkbox"/> 0 | <input type="checkbox"/> 1 | <input type="checkbox"/> 2 | <input type="checkbox"/> 3 | WM T2 Right         | <input type="checkbox"/> 0 | <input type="checkbox"/> 1 | <input type="checkbox"/> 2 | <input type="checkbox"/> 3 | WM DWI Right         | <input type="checkbox"/> 0 | <input type="checkbox"/> 1 | <input type="checkbox"/> 2 | <input type="checkbox"/> 3 |
| <hr/>               |                            |                            |                            |                            | <hr/>               |                            |                            |                            |                            | <hr/>                |                            |                            |                            |                            |
| Cortex T1 Left      | <input type="checkbox"/> 0 | <input type="checkbox"/> 1 | <input type="checkbox"/> 2 | <input type="checkbox"/> 3 | Cortex T2 Left      | <input type="checkbox"/> 0 | <input type="checkbox"/> 1 | <input type="checkbox"/> 2 | <input type="checkbox"/> 3 | Cortex DWI Left      | <input type="checkbox"/> 0 | <input type="checkbox"/> 1 | <input type="checkbox"/> 2 | <input type="checkbox"/> 3 |
| Cortex T1 Right     | <input type="checkbox"/> 0 | <input type="checkbox"/> 1 | <input type="checkbox"/> 2 | <input type="checkbox"/> 3 | Cortex T2 Right     | <input type="checkbox"/> 0 | <input type="checkbox"/> 1 | <input type="checkbox"/> 2 | <input type="checkbox"/> 3 | Cortex DWI Right     | <input type="checkbox"/> 0 | <input type="checkbox"/> 1 | <input type="checkbox"/> 2 | <input type="checkbox"/> 3 |
| <hr/>               |                            |                            |                            |                            | <hr/>               |                            |                            |                            |                            | <hr/>                |                            |                            |                            |                            |
| Brain Stem T1 Left  | <input type="checkbox"/> 0 | <input type="checkbox"/> 1 | <input type="checkbox"/> 2 |                            | Brain Stem T2 Left  | <input type="checkbox"/> 0 | <input type="checkbox"/> 1 | <input type="checkbox"/> 2 |                            | Brain Stem DWI Left  | <input type="checkbox"/> 0 | <input type="checkbox"/> 1 | <input type="checkbox"/> 2 |                            |
| Brain Stem T1 Right | <input type="checkbox"/> 0 | <input type="checkbox"/> 1 | <input type="checkbox"/> 2 |                            | Brain Stem T2 Right | <input type="checkbox"/> 0 | <input type="checkbox"/> 1 | <input type="checkbox"/> 2 |                            | Brain Stem DWI Right | <input type="checkbox"/> 0 | <input type="checkbox"/> 1 | <input type="checkbox"/> 2 |                            |
| <hr/>               |                            |                            |                            |                            | <hr/>               |                            |                            |                            |                            | <hr/>                |                            |                            |                            |                            |
| Cerebellum T1 Left  | <input type="checkbox"/> 0 | <input type="checkbox"/> 1 | <input type="checkbox"/> 2 | <input type="checkbox"/> 3 | Cerebellum T2 Left  | <input type="checkbox"/> 0 | <input type="checkbox"/> 1 | <input type="checkbox"/> 2 | <input type="checkbox"/> 3 | Cerebellum DWI Left  | <input type="checkbox"/> 0 | <input type="checkbox"/> 1 | <input type="checkbox"/> 2 | <input type="checkbox"/> 3 |
| Cerebellum T1 Right | <input type="checkbox"/> 0 | <input type="checkbox"/> 1 | <input type="checkbox"/> 2 | <input type="checkbox"/> 3 | Cerebellum T2 Right | <input type="checkbox"/> 0 | <input type="checkbox"/> 1 | <input type="checkbox"/> 2 | <input type="checkbox"/> 3 | Cerebellum DWI Right | <input type="checkbox"/> 0 | <input type="checkbox"/> 1 | <input type="checkbox"/> 2 | <input type="checkbox"/> 3 |

Subcortical Score (T1 +T2 + DWI): \_\_\_\_\_  
 White Matter score (T1 +T2 + DWI): \_\_\_\_\_  
 Cortex Score (T1 +T2 + DWI): \_\_\_\_\_  
 Brain stem Score (T1 +T2 + DWI): \_\_\_\_\_  
 Cerebellum Score (T1 +T2 + DWI): \_\_\_\_\_

Cumulative Score: \_\_\_\_\_  
 0 = Injury Grade 0  
 1-11 = Injury Grade 1  
 12-32 = Injury Grade 2  
 33-138 = Injury Grade 3

MRI Injury Grade: \_\_\_\_\_  
 MRI Injury grade # 0= Normal  
 MRI Injury grade # 1= Mild  
 MRI Injury grade # 2= Moderate  
 MRI Injury Grade # 3= Severe
